# Supplementary material for: Stimulated release of small molecules from polyelectrolyte multilayer nanocoatings
Source: Royal Society of Chemistry journal article supplement (doi:10.1039/b615699a), 2007-01-01
Supplement: b615699a.pdf [file b615699a.pdf]

## Stimulated release of small molecules from polyelectrolyte multilayer nanocoatings

Yang Zhong, Catherine F. Whittington and Donald T. Haynie\*

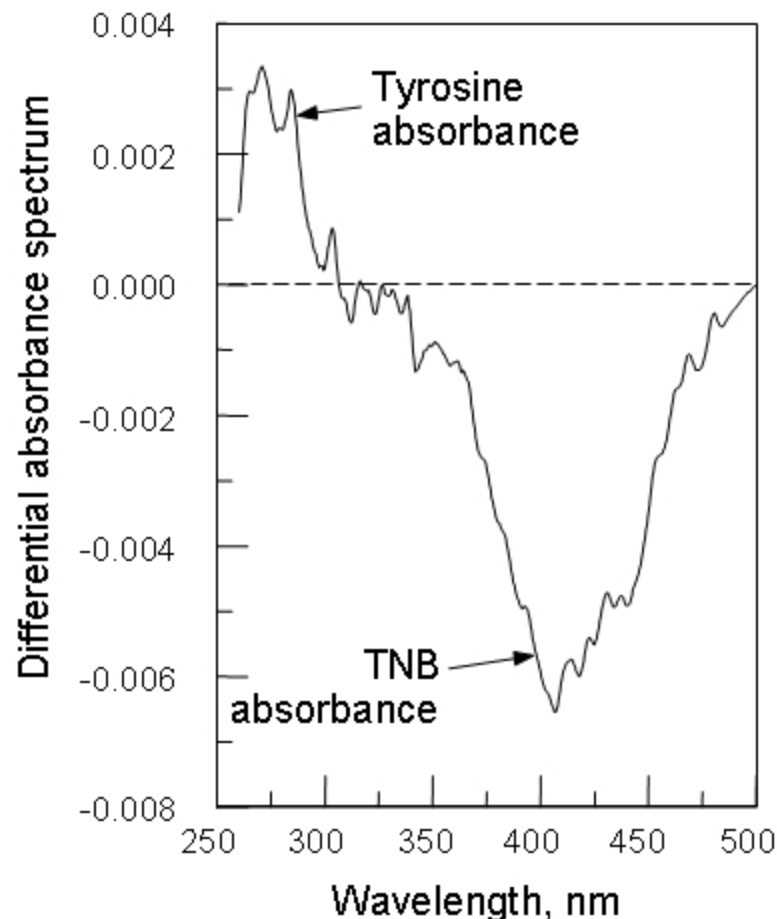

Difference between spectrum of LN1 in pH 7.4 TA buffer (see Fig. 1b) and spectrum of DTNB in pH 7.4 TA buffer for identical absorbance at 325 nm. The peak near 280 nm, which is due to the aromaticity of the tyrosine side chain, proves that the peptide was present in the LN1 spectrum. The peak near 410 nm indicates that some TNB dianion was present in the DTNB solution.
